# Supplementary material for: Community engagement and integrated health and polio immunisation campaigns in conflict-affected areas of Pakistan: a cluster randomised controlled trial
Source: PubMed Central journal article supplement — Lancet Glob Health. 2017 May 8;5(6):e593–603. doi: 10.1016/S2214-109X(17)30184-5 (PMC5439031; doi:10.1016/s2214-109x(17)30184-5), 2017-05-08
Supplement: mmc1.pdf [file mmc1.pdf]

# THE LANCET

## Global Health

### Supplementary appendix

This appendix formed part of the original submission and has been peer reviewed. We post it as supplied by the authors.

Supplement to: Habib MA, Soofi S, Cousens S, et al. Community engagement and integrated health and polio immunisation campaigns in conflict-affected areas of Pakistan: a cluster randomised controlled trial. *Lancet Glob Health* 2017; **5**: e593–603.

**Web Appendix**  
**Supplementary materials**

**Figure**  
**Gantt chart of activities**

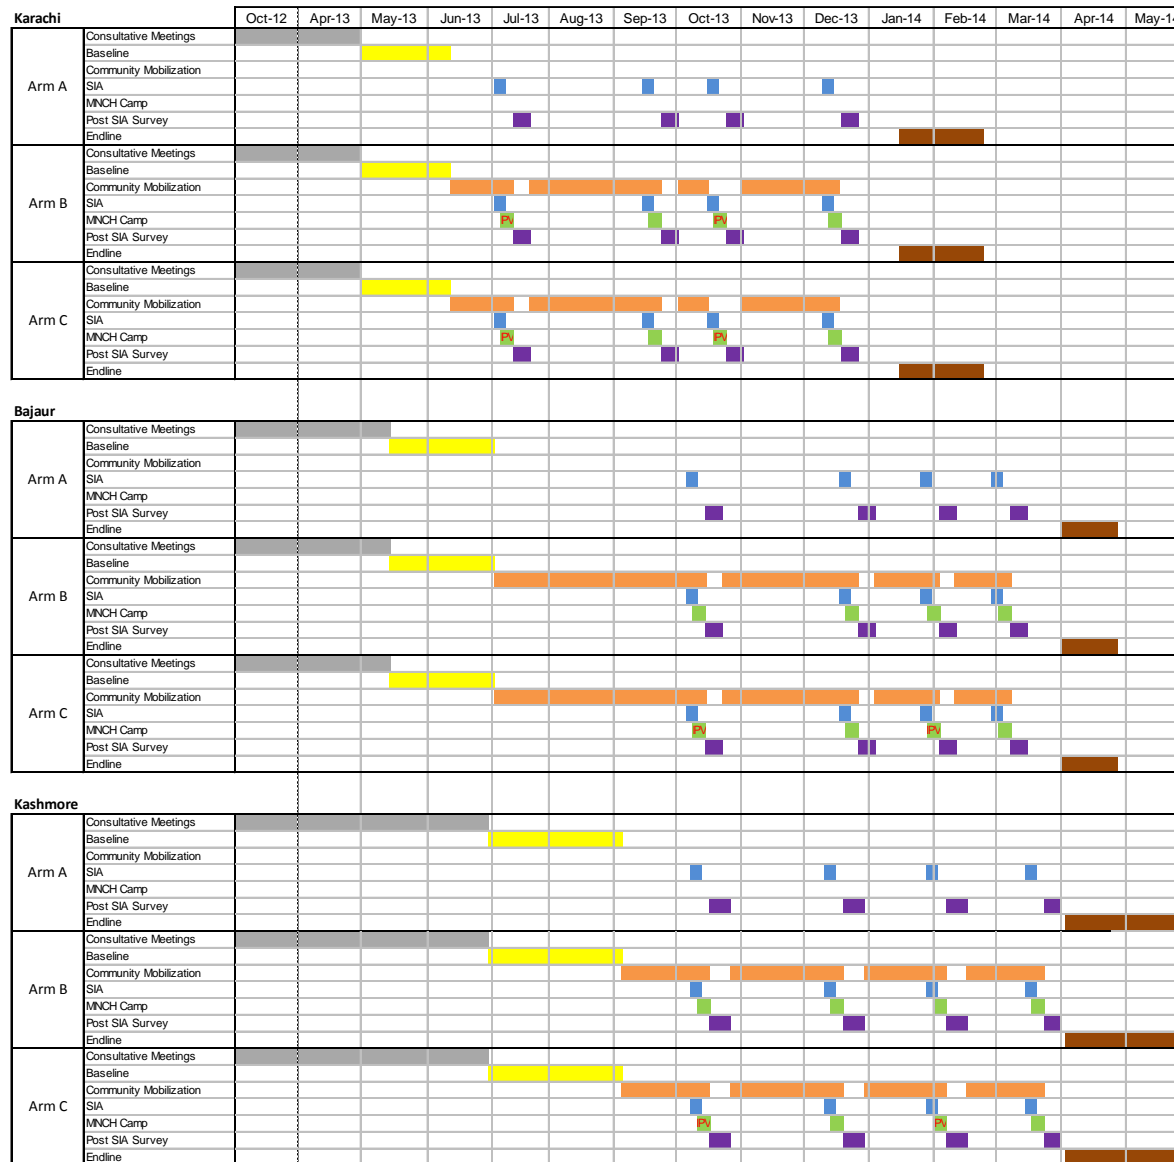

Web Table 1

## Global Wild Poliovirus 2011 - 2016

| Country or territory <sup>3</sup>          | Wild virus confirmed cases |            |            |            |                      |                              |           |                             | Wild virus reported from other sources <sup>2</sup> |            |            |            |            |            | Date of most recent virus |           |
|--------------------------------------------|----------------------------|------------|------------|------------|----------------------|------------------------------|-----------|-----------------------------|-----------------------------------------------------|------------|------------|------------|------------|------------|---------------------------|-----------|
|                                            | Total                      |            |            |            |                      | 01 Jan - 27 Dec <sup>1</sup> |           | Onset of most recent type 3 | Onset of most recent type 1                         | Total      |            |            |            |            |                           |           |
|                                            | 2011                       | 2012       | 2013       | 2014       | 2015                 | 2015                         | 2016      |                             |                                                     | 2011       | 2012       | 2013       | 2014       | 2015       |                           | 2016      |
| Pakistan                                   | 198                        | 58         | 93         | 306        | 54                   | 51                           | 19        | 18-Apr-12                   | 03-Nov-16                                           | 136        | 89         | 66         | 127        | 84         | 56                        | 02-Dec-16 |
| Afghanistan                                | 80                         | 37         | 14         | 28         | 20                   | 19                           | 12        | 11-Apr-10                   | 12-Oct-16                                           |            |            |            | 17         | 20         |                           | 27-Dec-15 |
| Nigeria                                    | 62                         | 122        | 53         | 6          | 0                    | 0                            | 4         | 10-Nov-12                   | 21-Aug-16                                           | 1          | 15         | 3          | 1          |            |                           | 05-May-14 |
| Somalia                                    | 0                          | 0          | 194        | 5          | 0                    | 0                            | 0         | NA                          | 11-Aug-14                                           |            |            |            |            |            |                           |           |
| Cameroon                                   | 0                          | 0          | 4          | 5          | 0                    | 0                            | 0         | 15-Oct-09                   | 09-Jul-14                                           |            |            |            |            |            |                           |           |
| Equatorial Guinea                          | 0                          | 0          | 0          | 5          | 0                    | 0                            | 0         | NA                          | 03-May-14                                           |            |            |            |            |            |                           |           |
| Iraq                                       | 0                          | 0          | 0          | 2          | 0                    | 0                            | 0         | NA                          | 07-Apr-14                                           |            |            |            |            |            |                           |           |
| Israel <sup>4</sup>                        | 0                          | 0          | 0          | 0          | 0                    | 0                            | 0         | NA                          | NA                                                  |            |            | 136        | 14         |            |                           | 30-Mar-14 |
| Syrian Arab Republic                       | 0                          | 0          | 35         | 1          | 0                    | 0                            | 0         | NA                          | 21-Jan-14                                           |            |            |            |            |            |                           |           |
| Ethiopia                                   | 0                          | 0          | 9          | 1          | 0                    | 0                            | 0         | NA                          | 05-Jan-14                                           |            |            |            |            |            |                           |           |
| West Bank and Gaza                         | 0                          | 0          | 0          | 0          | 0                    | 0                            | 0         | NA                          | NA                                                  |            |            | 7          | 1          |            |                           | 05-Jan-14 |
| Kenya                                      | 1                          | 0          | 14         | 0          | 0                    | 0                            | 0         | NA                          | 14-Jul-13                                           |            |            | 1          |            |            |                           | 12-Oct-13 |
| Egypt                                      | 0                          | 0          | 0          | 0          | 0                    | 0                            | 0         | NA                          | 03-May-04                                           |            | 2          |            |            |            |                           | 06-Dec-12 |
| Niger                                      | 5                          | 1          | 0          | 0          | 0                    | 0                            | 0         | 19-Jan-11                   | 15-Nov-12                                           |            |            |            |            |            |                           |           |
| Chad                                       | 132                        | 5          | 0          | 0          | 0                    | 0                            | 0         | 10-Mar-11                   | 14-Jun-12                                           |            |            |            |            |            |                           |           |
| DRC                                        | 93                         | 0          | 0          | 0          | 0                    | 0                            | 0         | 24-Jun-09                   | 20-Dec-11                                           |            |            |            |            |            |                           |           |
| CAR                                        | 4                          | 0          | 0          | 0          | 0                    | 0                            | 0         | 09-Aug-09                   | 08-Dec-11                                           |            |            |            |            |            |                           |           |
| China                                      | 21                         | 0          | 0          | 0          | 0                    | 0                            | 0         | NA                          | 09-Oct-11                                           |            |            |            |            |            |                           |           |
| Guinea                                     | 3                          | 0          | 0          | 0          | 0                    | 0                            | 0         | 03-Aug-11                   | 03-Nov-09                                           |            |            |            |            |            |                           |           |
| Côte d'Ivoire                              | 36                         | 0          | 0          | 0          | 0                    | 0                            | 0         | 24-Jul-11                   | 06-Aug-09                                           |            |            |            |            |            |                           |           |
| Angola                                     | 5                          | 0          | 0          | 0          | 0                    | 0                            | 0         | 17-Nov-08                   | 07-Jul-11                                           |            |            |            |            |            |                           |           |
| Mali                                       | 7                          | 0          | 0          | 0          | 0                    | 0                            | 0         | 23-Jun-11                   | 01-May-10                                           |            |            |            |            |            |                           |           |
| Congo                                      | 1                          | 0          | 0          | 0          | 0                    | 0                            | 0         | NA                          | 22-Jan-11                                           |            |            |            |            |            |                           |           |
| Gabon                                      | 1                          | 0          | 0          | 0          | 0                    | 0                            | 0         | NA                          | 15-Jan-11                                           |            |            |            |            |            |                           |           |
| India                                      | 1                          | 0          | 0          | 0          | 0                    | 0                            | 0         | 22-Oct-10                   | 13-Jan-11                                           |            |            |            |            |            |                           | 10-Nov-10 |
| <b>Total</b>                               | <b>650</b>                 | <b>223</b> | <b>416</b> | <b>359</b> | <b>74</b>            | <b>70</b>                    | <b>35</b> |                             |                                                     | <b>137</b> | <b>106</b> | <b>213</b> | <b>160</b> | <b>104</b> | <b>56</b>                 |           |
| <b>Total wild virus type 1<sup>5</sup></b> | <b>583</b>                 | <b>202</b> | <b>416</b> | <b>359</b> | <b>74</b>            | <b>70</b>                    | <b>35</b> |                             |                                                     |            |            |            |            |            |                           |           |
| <b>Total wild virus type 3</b>             | <b>67</b>                  | <b>21</b>  | <b>0</b>   | <b>0</b>   | <b>0</b>             | <b>0</b>                     | <b>0</b>  |                             |                                                     |            |            |            |            |            |                           |           |
| <b>Tot. in endemic countries</b>           | <b>341</b>                 | <b>217</b> | <b>160</b> | <b>340</b> | <b>74</b>            | <b>70</b>                    | <b>35</b> |                             |                                                     |            |            |            |            |            |                           |           |
| <b>Tot. in non-end countries</b>           | <b>309</b>                 | <b>6</b>   | <b>256</b> | <b>19</b>  | <b>0</b>             | <b>0</b>                     | <b>0</b>  |                             |                                                     |            |            |            |            |            |                           |           |
| <b>No. of countries (infected)</b>         | <b>16</b>                  | <b>5</b>   | <b>8</b>   | <b>9</b>   | <b>2</b>             | <b>2</b>                     | <b>3</b>  |                             |                                                     |            |            |            |            |            |                           |           |
| <b>No. of countries (endemic)</b>          | <b>4</b>                   | <b>3</b>   | <b>3</b>   | <b>3</b>   | <b>3<sup>6</sup></b> | <b>3<sup>6</sup></b>         | <b>3</b>  |                             |                                                     |            |            |            |            |            |                           |           |

Countries in yellow are endemic <sup>1</sup>Data in WHO HQ on 28 December 2015 for 2015 data and 27 December 2016 for 2016 data.

<sup>2</sup>Wild viruses from environmental samples, contacts & other sources. <sup>3</sup>In March 2014, a serotype 1 wild poliovirus was detected in an environment specimen from Brazil, further investigation indicates this is an isolated event without evidence of circulation. <sup>4</sup>Results are based on L20B positive culture. Prior to reporting week 16, 2014, results were based on a combination of direct qRT-PCR on RNA from concentrated sewage and L20B positive culture. <sup>5</sup>Includes 1 case in 2012 with a mixture of W1W3 virus.

<sup>6</sup>Between 27 Sep 2015 and 27 Sep 2016. Nigeria was not classified as endemic. NA - Most recent case had onset date 1999

Data in WHO Headquarters as of Dec 27, 2016

**Web Table 2: Sample Size Estimation**

|                                                                                                                   |      |
|-------------------------------------------------------------------------------------------------------------------|------|
|                                                                                                                   |      |
| Estimated mean OPV coverage in communities without the intervention<br>(per true population denominator) baseline | 80%  |
| Average OPV coverage communities with the intervention                                                            | 85%  |
| Average number of children/cluster                                                                                | 150  |
| Value of z-alpha (for a significance level of 5% insert 1.96)                                                     | 1.96 |
| Coefficient of Variation                                                                                          | 0.14 |
| Number of clusters required in each arm                                                                           | 120  |
| Total number of clusters (3 Arms)                                                                                 | 360  |
| Power of the study                                                                                                | 90%  |

**Web Table 3: Community mobilization Sessions by Site & group**

| <b>Site</b> | <b>Estimated Population</b> | <b>Mobilization at household level</b> | <b>Sessions with Female groups</b> | <b>Sessions with Male groups</b> | <b>Sessions with Health Care Providers</b> | <b>Sessions with Influencers</b> |
|-------------|-----------------------------|----------------------------------------|------------------------------------|----------------------------------|--------------------------------------------|----------------------------------|
| Karachi     | 141849                      | 7940                                   | 75                                 | 89                               | 122                                        | 41                               |
| Bajaur      | 200768                      | 5500                                   | 18                                 | 75                               | 34                                         | 21                               |
| Kashmore    | 145353                      | 7074                                   | 101                                | 88                               | 56                                         | 68                               |

**Web Table 4: Completeness of post-SIA surveys by round site and arm (i.e. proportion of records which were complete)**

|                | Site              |                                                 |                                                         |                    |                                                 |                                                         |                    |                                                 |                                                         |
|----------------|-------------------|-------------------------------------------------|---------------------------------------------------------|--------------------|-------------------------------------------------|---------------------------------------------------------|--------------------|-------------------------------------------------|---------------------------------------------------------|
|                | Karachi           |                                                 |                                                         | Bajaur             |                                                 |                                                         | Kashmore           |                                                 |                                                         |
|                | Control (Arm A)   | Community Mobilization and Health Camps (Arm B) | Community Mobilization and Health Camps and IPV (Arm C) | Control (Arm A)    | Community Mobilization and Health Camps (Arm B) | Community Mobilization and Health Camps and IPV (Arm C) | Control (Arm A)    | Community Mobilization and Health Camps (Arm B) | Community Mobilization and Health Camps and IPV (Arm C) |
| <b>Round 1</b> | 89%<br>(553/630)  | 89%<br>(555/630)                                | 88%<br>(524/600)                                        | 63%<br>(746/1200)  | 91%<br>(1093/1200)                              | 91%<br>(1092/1200)                                      | 96%<br>(1184/1230) | 96%<br>(1153/1200)                              | 92%<br>(1157/1260)                                      |
| <b>Round 2</b> | 59%<br>(705/1200) | 65%<br>(810/1260)                               | 69%<br>(820/1200)                                       | 91%<br>(1090/1200) | 95%<br>(1148/1200)                              | 90%<br>(1075/1200)                                      | 97%<br>(1196/1230) | 97%<br>(1169/1200)                              | 97%<br>(1226/1260)                                      |
| <b>Round 3</b> | 84%<br>(999/1170) | 86%<br>(1097/1260)                              | 84%<br>(1019/1200)                                      | 95%<br>(1133/1200) | 98%<br>(1179/1200)                              | 91%<br>(1087/1200)                                      | 97%<br>(1193/1230) | 98%<br>(1172/1200)                              | 98%<br>(1223/1260)                                      |
| <b>Round 4</b> | 77%<br>(801/1020) | 81%<br>(1037/1260)                              | 79%<br>(955/1200)                                       | 97%<br>(1168/1200) | 97%<br>(1177/1200)                              | 86%<br>(1042/1200)                                      | 90%<br>(1128/1230) | 89%<br>(1094/1200)                              | 94%<br>(1195/1260)                                      |





**Web Table 5: Reasons given for non-receipt of OPV**

|                       | <b>Team did not visit</b> | <b>Child was away</b> | <b>Child was asleep</b> | <b>Child was ill</b> | <b>Refused</b> | <b>Other</b> | <b>Total</b> |
|-----------------------|---------------------------|-----------------------|-------------------------|----------------------|----------------|--------------|--------------|
| <b>Overall</b>        | 4449 (51%)                | 1850 (21%)            | 733 (8%)                | 161 (2%)             | 180 (2%)       | 1305 (15%)   | 8678 (100%)  |
| <b>Control</b>        | 2063 (58%)                | 673 (19%)             | 251 (7%)                | 29 (1%)              | 111 (3%)       | 442 (12%)    | 3769 (100%)  |
| <b>Camp, no IPV</b>   | 1299 (48%)                | 683 (25%)             | 232 (9%)                | 42 (2%)              | 40 (1%)        | 399 (15%)    | 2695 (100%)  |
| <b>Camp, with IPV</b> | 1087 (45%)                | 494 (20%)             | 250 (10%)               | 90 (4%)              | 29 (1%)        | 494 (20%)    | 2414 (100%)  |
| <b>Karachi</b>        | 1437 (64%)                | 398 (18%)             | 47 (2%)                 | 41 (2%)              | 174 (8%)       | 162 (7%)     | 2259 (100%)  |
| <b>Bajaur</b>         | 986 (47%)                 | 426 (20%)             | 205 (10%)               | 20 (1%)              | 1 (<1%)        | 454 (22%)    | 2092 (100%)  |
| <b>Kashmore</b>       | 2026 (47%)                | 1026 (24%)            | 481 (11%)               | 100 (2%)             | 5 (<1%)        | 689 (16%)    | 4327 (100%)  |
| <b>Round 1</b>        | 1606 (55%)                | 627 (21%)             | 227 (8%)                | 39 (1%)              | 79 (3%)        | 366 (13%)    | 2944 (100%)  |
| <b>Round 2</b>        | 1011 (54%)                | 353 (19%)             | 162 (9%)                | 60 (3%)              | 30 (2%)        | 244 (13%)    | 1860 (100%)  |
| <b>Round 3</b>        | 1056 (47%)                | 551 (25%)             | 165 (7%)                | 26 (1%)              | 545 (2%)       | 381 (17%)    | 2233 (100%)  |
| <b>Round 4</b>        | 776 (47%)                 | 319 (19%)             | 179 (11%)               | 36 (2%)              | 17 (1%)        | 319 (19%)    | 1641 (100%)  |

**Web Table 6: Reasons given for non-receipt of IPV**

|                 | <b>Did not visit camp</b> | <b>Child was absent</b> | <b>Child was ill</b> | <b>Vaccine not safe</b> | <b>Refused</b> | <b>Other</b> | <b>Total</b> |
|-----------------|---------------------------|-------------------------|----------------------|-------------------------|----------------|--------------|--------------|
| <b>Overall</b>  | 83 (15%)                  | 188 (35%)               | 30 (5%)              | 26 (5%)                 | 103 (19%)      | 115 (21%)    | 545 (100%)   |
| <b>Karachi</b>  | 25 (13%)                  | 44 (23%)                | 8 (4%)               | 19 (10%)                | 41 (22%)       | 52 (28%)     | 189 (100%)   |
| <b>Bajaur</b>   | 47 (20%)                  | 89 (37%)                | 7 (3%)               | 7 (3%)                  | 45 (18%)       | 44 (19%)     | 239 (100%)   |
| <b>Kashmore</b> | 11 (9%)                   | 55 (47%)                | 16 (14%)             | 0 (0%)                  | 17 (14%)       | 18 (15%)     | 117 (100%)   |
| <b>Round 1</b>  | 26 (8%)                   | 114 (37%)               | 23 (21%)             | 18 (6%)                 | 65 (21%)       | 66 (22%)     | 312 (100%)   |
| <b>Round 3</b>  | 57 (24%)                  | 74 (32%)                | 7 (3%)               | 8 (3%)                  | 38 (16%)       | 49 (20%)     | 233 (100%)   |

**Web Table 7: KAP about IPV**

---

---

---

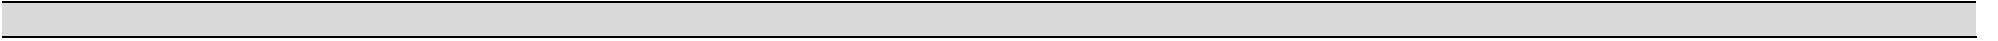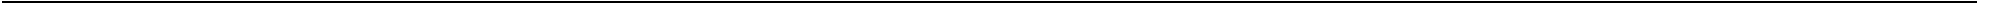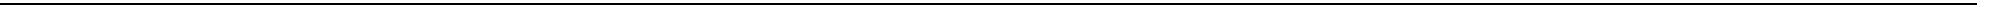

|                                                                                                                    | Site         | Arm                    |                                               |                                                     |
|--------------------------------------------------------------------------------------------------------------------|--------------|------------------------|-----------------------------------------------|-----------------------------------------------------|
|                                                                                                                    |              | Control (Arm A)        | Community Mobilization + Health Camps (Arm B) | Community Mobilization + Health Camps + IPV (Arm C) |
| Awareness on availability of IPV in addition to OPV<br>(Proportion aware of availability of IPV)                   | Karachi      | 13% (9 to 16%)         | 41% (32 to 49%)                               | 74% (69 to 79%)                                     |
|                                                                                                                    | Bajaur       | 22% (14 to 29%)        | 30% (23 to 38%)                               | 87% (84 to 91%)                                     |
|                                                                                                                    | Kashmore     | 19% (12 to 26%)        | 46% (36 to 57%)                               | 93% (91 to 96%)                                     |
|                                                                                                                    | <b>Total</b> | <b>18% (14 to 21%)</b> | <b>40% (34 to 45%)</b>                        | <b>84% (82 to 87%)</b>                              |
| Perception regarding use of IPV<br>(Proportion having positive perception about IPV)                               | Karachi      | 52% (46 to 58%)        | 72% (65 to 79%)                               | 90% (87 to 92%)                                     |
|                                                                                                                    | Bajaur       | 59% (51 to 68%)        | 66% (58 to 75%)                               | 95% (93 to 96%)                                     |
|                                                                                                                    | Kashmore     | 77% (69 to 86%)        | 91% (87 to 95%)                               | 98% (97 to 99%)                                     |
|                                                                                                                    | <b>Total</b> | <b>63% (59 to 68%)</b> | <b>77% (73 to 81%)</b>                        | <b>94% (93 to 96%)</b>                              |
| Perception regarding safety of IPV<br>(Proportion considering IPV as “completely safe”)                            | Karachi      | 28% (22 to 34%)        | 49% (41 to 58%)                               | 73% (69 to 78%)                                     |
|                                                                                                                    | Bajaur       | 35% (26 to 43%)        | 42% (35 to 50%)                               | 79% (74 to 84%)                                     |
|                                                                                                                    | Kashmore     | 63% (54 to 72%)        | 78% (70 to 86%)                               | 91% (87 to 95%)                                     |
|                                                                                                                    | <b>Total</b> | <b>42% (38 to 48%)</b> | <b>57% (52 to 63%)</b>                        | <b>81% (79 to 84%)</b>                              |
| Acceptability of IPV for children under 5<br>(Proportion willing to have their children vaccinated with IPV)       | Karachi      | 65% (61 to 69%)        | 78% (74 to 81%)                               | 82% (79 to 85%)                                     |
|                                                                                                                    | Bajaur       | 77% (70 to 85%)        | 81% (74 to 89%)                               | 96% (95 to 98%)                                     |
|                                                                                                                    | Kashmore     | 93% (89 to 96%)        | 94% (91 to 97%)                               | 93% (91 to 96%)                                     |
|                                                                                                                    | <b>Total</b> | <b>79% (75 to 82%)</b> | <b>84% (82 to 87%)</b>                        | <b>90% (89 to 92%)</b>                              |
| Knowledge about use of IPV in combination with OPV<br>(Proportion aware of benefits of IPV OPV use in combination) | Karachi      | 71% (68 to 75%)        | 79% (75 to 84%)                               | 86% (83 to 89%)                                     |
|                                                                                                                    | Bajaur       | 80% (73 to 86%)        | 82% (76 to 88%)                               | 95% (93 to 97%)                                     |
|                                                                                                                    | Kashmore     | 95% (92 to 98%)        | 97% (95 to 99%)                               | 98% (97 to 99%)                                     |
|                                                                                                                    | <b>Total</b> | <b>82% (79 to 85%)</b> | <b>87% (84 to 89%)</b>                        | <b>93% (91 to 94%)</b>                              |

|  |  |  |  |  |  |
|--|--|--|--|--|--|
|  |  |  |  |  |  |
|--|--|--|--|--|--|

**MCCP-1: Baseline questionnaire**

**Instructions:** Introduce yourself and explain the reason of your arrival.

Before starting the interview take verbal consent, did you get permission? YES

NO

If permission not granted, stop interviewing and proceed to the next household.

| <b>Section 1: Identification Information</b> |                                                                                                                                                                                                                                                                                                          |                                                                                  |
|----------------------------------------------|----------------------------------------------------------------------------------------------------------------------------------------------------------------------------------------------------------------------------------------------------------------------------------------------------------|----------------------------------------------------------------------------------|
| 1.1                                          | Name of City:                                                                                                                                                                                                                                                                                            | 1)Karachi (3) Bajaor (4) Kashmore                                                |
| 1.2                                          | Union Council / Tehsil (Code) :                                                                                                                                                                                                                                                                          | <input type="checkbox"/> <input type="checkbox"/> _____                          |
| 1.3                                          | Block, Street, Colony, Village code/ Name:                                                                                                                                                                                                                                                               | <input type="checkbox"/> <input type="checkbox"/> <input type="checkbox"/> _____ |
| 1.4                                          | Cluster Number:                                                                                                                                                                                                                                                                                          | <input type="checkbox"/> <input type="checkbox"/> <input type="checkbox"/>       |
| 1.5                                          | House Hold number:                                                                                                                                                                                                                                                                                       | <input type="checkbox"/> <input type="checkbox"/> <input type="checkbox"/>       |
| 1.6                                          | Complete Address including landmark:                                                                                                                                                                                                                                                                     | _____<br>_____                                                                   |
| 1.7                                          | Name/Code of Interviewer:                                                                                                                                                                                                                                                                                | <input type="checkbox"/> <input type="checkbox"/> _____                          |
| 1.8                                          | Name of Respondent :                                                                                                                                                                                                                                                                                     |                                                                                  |
|                                              | Age of Respondent (In Years) :                                                                                                                                                                                                                                                                           |                                                                                  |
| 1.9                                          | Gender of Respondent:                                                                                                                                                                                                                                                                                    | 1. Male: <input type="checkbox"/> 2. Female <input type="checkbox"/>             |
| 1.10                                         | Qualification of Respondent:(Mention complete years of education, mention code 55 for un educated, 17 for Professional and 22 for religious studies respectively.                                                                                                                                        |                                                                                  |
| 1.11                                         | Profession of Respondent: (Use Codes from Question Number 16)                                                                                                                                                                                                                                            |                                                                                  |
| 1.12                                         | Interview Date/Time HH ____ MM ____                                                                                                                                                                                                                                                                      | YY ____ MM ____ DD ____                                                          |
| 1.13                                         | Result Of Interview:                                                                                                                                                                                                                                                                                     | (1) Complete (2) Incomplete                                                      |
| 1.14                                         | If the interview is Incomplete, Mention the Reason.                                                                                                                                                                                                                                                      | Reason:<br>_____<br>_____                                                        |
| Codes For Profession                         | 1)Professional 2)Office worker 3)Business man 4)Soldier/working wearing uniform<br>5) Unskilled working with hands 6) Skilled working with hands 7) Vegetable seller 8) Vendor<br>9) Farmer 10) Cook 11) Driver 12) Student 13) Unemployed 14) Retired 15) Housewife<br>Janitor<br>17) Laboratory worker |                                                                                  |

**Section 2:**

|     |                                             |                                                      |                                                          |                                   |        |         |
|-----|---------------------------------------------|------------------------------------------------------|----------------------------------------------------------|-----------------------------------|--------|---------|
| 2.1 | (a) Total family members including Children | (b) Male Members including male children of all ages | (c) Female Members including female children of all ages | (d) Number of under-five children |        | Remarks |
|     |                                             |                                                      |                                                          | Male                              | Female |         |
|     |                                             |                                                      |                                                          |                                   |        |         |

| 2.2 | (a) Name of Child | (b) Father's Name | (c) (Gender)                |       | (d) Age |      |                      | (e)<br>Vitamin A drops given in last 6 months?<br>Yes ---1 No ----2 | (f)<br>OPV given in last campaign?<br>Yes ---1 No ----2 | (g)<br>During polio campaign how many times polio drops are given?- | Vaccination Card available<br>Yes ---1<br>No ---2 | Immunization Status (To be filled for every under 5- Child present in Household) |                      |                      |                      |                      |  |
|-----|-------------------|-------------------|-----------------------------|-------|---------|------|----------------------|---------------------------------------------------------------------|---------------------------------------------------------|---------------------------------------------------------------------|---------------------------------------------------|----------------------------------------------------------------------------------|----------------------|----------------------|----------------------|----------------------|--|
|     |                   |                   | Male -----1<br>Female-----2 | Years | Months  | Days | At Birth             |                                                                     |                                                         |                                                                     |                                                   | At 6 Weeks                                                                       | At 10 Weeks          | At 14 Weeks          | At 9 months          | At 15 months         |  |
|     |                   |                   |                             |       |         |      | Yes ---1<br>No ----2 |                                                                     |                                                         |                                                                     |                                                   | Yes ---1<br>No ----2                                                             | Yes ---1<br>No ----2 | Yes ---1<br>No ----2 | Yes ---1<br>No ----2 | Yes ---1<br>No ----2 |  |
| 1   |                   |                   |                             |       |         |      |                      |                                                                     |                                                         |                                                                     | BCG                                               | Penta 1                                                                          | Penta 2              | Penta 3              | Measles1             | Measles 2            |  |
|     |                   |                   |                             |       |         |      |                      |                                                                     |                                                         |                                                                     | Source                                            | Source                                                                           | Source               | Source               | Source               | Source               |  |
|     |                   |                   |                             |       |         |      |                      |                                                                     |                                                         |                                                                     | Scar                                              | PCV 1                                                                            | PCV 2                | PCV 3                |                      |                      |  |
|     |                   |                   |                             |       |         |      |                      |                                                                     |                                                         |                                                                     | OPV 0                                             | Source                                                                           | Source               | Source               |                      |                      |  |
|     |                   |                   |                             |       |         |      |                      |                                                                     |                                                         |                                                                     | Source                                            | OPV 1                                                                            | OPV 2                | OPV 3                |                      |                      |  |
|     |                   |                   |                             |       |         |      |                      |                                                                     |                                                         |                                                                     |                                                   | Source                                                                           | Source               | Source               |                      |                      |  |
| 2   |                   |                   |                             |       |         |      |                      |                                                                     |                                                         |                                                                     | BCG                                               | Penta 1                                                                          | Penta 2              | Penta 3              | Measles1             | Measles 2            |  |
|     |                   |                   |                             |       |         |      |                      |                                                                     |                                                         |                                                                     | Source                                            | Source                                                                           | Source               | Source               | Source               | Source               |  |
|     |                   |                   |                             |       |         |      |                      |                                                                     |                                                         |                                                                     | Scar                                              | PCV 1                                                                            | PCV 2                | PCV 3                |                      |                      |  |
|     |                   |                   |                             |       |         |      |                      |                                                                     |                                                         |                                                                     | OPV 0                                             | Source                                                                           | Source               | Source               |                      |                      |  |
|     |                   |                   |                             |       |         |      |                      |                                                                     |                                                         |                                                                     | Source                                            | OPV 1                                                                            | OPV 2                | OPV 3                |                      |                      |  |
|     |                   |                   |                             |       |         |      |                      |                                                                     |                                                         |                                                                     |                                                   | Source                                                                           | Source               | Source               |                      |                      |  |

**Codes:** Source= [1] Card [2] Reported by mother/care taker Scar Yes [1] No [2] Child not available [3]



List the under five children & answer the questions. If there are more than 7 children, please write on extra sheet.

| 2.2 | (b) Name of Child | (b) Father's Name | (c) (Gender)                |       | (d) Age |      |                                                               | (e)                                              | (f)                                                           | (g)                   | Vaccination Card available<br>Yes ---1<br>No ---2 | Immunization Status (To be filled for every under 5- Child present in Household) |                       |                       |                       |                       |  |         |  |          |  |           |  |
|-----|-------------------|-------------------|-----------------------------|-------|---------|------|---------------------------------------------------------------|--------------------------------------------------|---------------------------------------------------------------|-----------------------|---------------------------------------------------|----------------------------------------------------------------------------------|-----------------------|-----------------------|-----------------------|-----------------------|--|---------|--|----------|--|-----------|--|
|     |                   |                   | Male -----1<br>Female-----2 | Years | Months  | Days | Vitamin A drops given in last 6 months?<br>Yes ---1 No -----2 | OPV given in last campaign?<br>Yes ---1 No ----2 | During polio campaign how many times polio drops are given?:- | At Birth              |                                                   | At 6 Weeks                                                                       | At 10 Weeks           | At 14 Weeks           | At 9 months           | At 15 months          |  |         |  |          |  |           |  |
|     |                   |                   |                             |       |         |      |                                                               |                                                  |                                                               | Yes ---1<br>No -----2 |                                                   | Yes ---1<br>No -----2                                                            | Yes ---1<br>No -----2 | Yes ---1<br>No -----2 | Yes ---1<br>No -----2 | Yes ---1<br>No -----2 |  |         |  |          |  |           |  |
| 3   |                   |                   |                             |       |         |      |                                                               |                                                  |                                                               |                       |                                                   | BCG                                                                              |                       | Penta 1               |                       | Penta 2               |  | Penta 3 |  | Measles1 |  | Measles 2 |  |
|     |                   |                   |                             |       |         |      |                                                               |                                                  |                                                               |                       |                                                   | Source                                                                           |                       | Source                |                       | Source                |  | Source  |  | Source   |  | Source    |  |
|     |                   |                   |                             |       |         |      |                                                               |                                                  |                                                               |                       |                                                   | Scar                                                                             |                       | PCV 1                 |                       | PCV 2                 |  | PCV 3   |  |          |  |           |  |
|     |                   |                   |                             |       |         |      |                                                               |                                                  |                                                               |                       |                                                   | OPV 0                                                                            |                       | Source                |                       | Source                |  | Source  |  |          |  |           |  |
|     |                   |                   |                             |       |         |      |                                                               |                                                  |                                                               |                       |                                                   | Source                                                                           |                       | OPV 1                 |                       | OPV 2                 |  | OPV 3   |  |          |  |           |  |
|     |                   |                   |                             |       |         |      |                                                               |                                                  |                                                               |                       |                                                   |                                                                                  |                       | Source                |                       | Source                |  | Source  |  |          |  |           |  |
| 4   |                   |                   |                             |       |         |      |                                                               |                                                  |                                                               |                       |                                                   | BCG                                                                              |                       | Penta 1               |                       | Penta 2               |  | Penta 3 |  | Measles1 |  | Measles 2 |  |
|     |                   |                   |                             |       |         |      |                                                               |                                                  |                                                               |                       |                                                   | Source                                                                           |                       | Source                |                       | Source                |  | Source  |  | Source   |  | Source    |  |
|     |                   |                   |                             |       |         |      |                                                               |                                                  |                                                               |                       |                                                   | Scar                                                                             |                       | PCV 1                 |                       | PCV 2                 |  | PCV 3   |  |          |  |           |  |
|     |                   |                   |                             |       |         |      |                                                               |                                                  |                                                               |                       |                                                   | OPV 0                                                                            |                       | Source                |                       | Source                |  | Source  |  |          |  |           |  |
|     |                   |                   |                             |       |         |      |                                                               |                                                  |                                                               |                       |                                                   | Source                                                                           |                       | OPV 1                 |                       | OPV 2                 |  | OPV 3   |  |          |  |           |  |
|     |                   |                   |                             |       |         |      |                                                               |                                                  |                                                               |                       |                                                   |                                                                                  |                       | Source                |                       | Source                |  | Source  |  |          |  |           |  |
| 5   |                   |                   |                             |       |         |      |                                                               |                                                  |                                                               |                       |                                                   | BCG                                                                              |                       | Penta 1               |                       | Penta 2               |  | Penta 3 |  | Measles1 |  | Measles 2 |  |
|     |                   |                   |                             |       |         |      |                                                               |                                                  |                                                               |                       |                                                   | Source                                                                           |                       | Source                |                       | Source                |  | Source  |  | Source   |  | Source    |  |
|     |                   |                   |                             |       |         |      |                                                               |                                                  |                                                               |                       |                                                   | Scar                                                                             |                       | PCV 1                 |                       | PCV 2                 |  | PCV 3   |  |          |  |           |  |
|     |                   |                   |                             |       |         |      |                                                               |                                                  |                                                               |                       |                                                   | OPV 0                                                                            |                       | Source                |                       | Source                |  | Source  |  |          |  |           |  |
|     |                   |                   |                             |       |         |      |                                                               |                                                  |                                                               |                       |                                                   | Source                                                                           |                       | OPV 1                 |                       | OPV 2                 |  | OPV 3   |  |          |  |           |  |
|     |                   |                   |                             |       |         |      |                                                               |                                                  |                                                               |                       |                                                   |                                                                                  |                       | Source                |                       | Source                |  | Source  |  |          |  |           |  |

Codes: Source= [1] Card [2] Reported by mother/care taker Scar Yes [1] No [2] Child not available [3]



### Section 3: Socio Economics and Demographic Characteristic

| Question Number | Question                                                                            | Answers                                                                                                                                                                                                                                                                     | Skips                                     |
|-----------------|-------------------------------------------------------------------------------------|-----------------------------------------------------------------------------------------------------------------------------------------------------------------------------------------------------------------------------------------------------------------------------|-------------------------------------------|
| 3.1             | What is the primary construction material Used to build the house (by Observation)? | 1. Cement 2. Lime Bricks 3. Red Bricks<br>4. Wood 5. Tin sheets 6. Thatch<br>7. Any Other Explain: _____<br>_____                                                                                                                                                           |                                           |
| 3.2             | Observe the primary construction material Used to build the roof?                   | 1. Bricks/Tiles 2. Cement 3. Wooden<br>4. Thatch 5. Sand/Mud<br>7. Any Other Explain: _____<br>_____                                                                                                                                                                        |                                           |
| 3.3             | What is the owner ship status of this house?                                        | 1. Owned 2. By employer 3. Rented<br>4. Gifted 7. Any Other<br>Explain: _____<br>_____                                                                                                                                                                                      | If the Answer Is 1,2 OR 4 so skip Q # 3.4 |
| 3.4             | If this house is rental, what is the monthly Rent of this house?                    | Rupees: _____                                                                                                                                                                                                                                                               |                                           |
| 3.5             | How many rooms in this HH used for sleeping?                                        | Quantity: <input type="text"/> <input type="text"/>                                                                                                                                                                                                                         |                                           |
| 3.6             | What kind of toilet facility do members of your HH family usually use?              | 1. Flush/piped sewerage 2. Pit flush<br>3. Flush attached to open sewerage lines<br>4. Qadamcha laterine 5. Open ground<br>7. Any Other Explain: _____<br>_____                                                                                                             |                                           |
| 3.7             | What is the drainage system of this HH?<br>( Through observation)                   | 1. Underground sewerage lines<br>2. Open sewerage line<br>3. Unattached sewerage lines<br>7. Any Other Explain: _____<br>_____                                                                                                                                              |                                           |
| 3.8             | What is the important source of drinking water In this HH?                          | 1. Govt.Piped water 2. Govt. well<br>3. Govt. Hand pump 4. Bottle water (mineral Water)<br>5. Water tanker/ cart with a small Tank Or drum etc. 6. Own tap 7. Own well<br>8. Own hand pump 9. Lake/pond/stream Water<br>10. Boring 11. Any Other<br>Explain: _____<br>_____ | Multiple responses                        |
| 3.9             | Do you usually buy water to use at HH?                                              | 1.Yes <input type="checkbox"/> 2. No <input type="checkbox"/> 3. Sometimes <input type="checkbox"/>                                                                                                                                                                         |                                           |

|      |                                                                        |                                                                                                                                |                    |
|------|------------------------------------------------------------------------|--------------------------------------------------------------------------------------------------------------------------------|--------------------|
| 3.10 | What fuel does your HH use for cooking?                                | 1. Electricity 2. Gas 3. Wood<br>4. kerosene oil 5. Coal 6. Muck (Gobar)<br>7. Any Other Explain: _____<br>_____               | Multiple responses |
| 3.11 | What transport does most of the family Members of this HH usually use? | 1. Private car 2. Company car 3. Motorcycle<br>4. Public transport 5. By walk 6. Cycle<br>7. Any Other Explain: _____<br>_____ |                    |

Question #: 3.12 : Do you have the following objects at your home? If Yes so tick mark on the respective column.

|                                                                           |                                                                                                                                                                                                                                                                                                                                       |                   |                              |                             |              |                     |     |
|---------------------------------------------------------------------------|---------------------------------------------------------------------------------------------------------------------------------------------------------------------------------------------------------------------------------------------------------------------------------------------------------------------------------------|-------------------|------------------------------|-----------------------------|--------------|---------------------|-----|
| Electricity                                                               | [ ]                                                                                                                                                                                                                                                                                                                                   | Refrigerator      | [ ]                          | T.V                         | [ ]          | Motor Sycle         | [ ] |
| Radio                                                                     | [ ]                                                                                                                                                                                                                                                                                                                                   | Sewing Machine    | [ ]                          | Sofa                        | [ ]          | Cycle               | [ ] |
| Telephone                                                                 | [ ]                                                                                                                                                                                                                                                                                                                                   | Cable             | [ ]                          | Washing Machine             | [ ]          | Car                 | [ ] |
| Boat                                                                      | [ ]                                                                                                                                                                                                                                                                                                                                   | Mobile Phone      | [ ]                          | Electric fan                | [ ]          | V.C.R               | [ ] |
| Air conditioner                                                           | [ ]                                                                                                                                                                                                                                                                                                                                   | Air cooler        | [ ]                          | Geyser                      | [ ]          | Microwave oven      | [ ] |
| Iron                                                                      | [ ]                                                                                                                                                                                                                                                                                                                                   | Personal computer | [ ]                          | Camera                      | [ ]          | Heater              | [ ] |
| 3.13                                                                      | For how long you had been living in this house?                                                                                                                                                                                                                                                                                       |                   | Months: <input type="text"/> | Years: <input type="text"/> |              |                     |     |
| 3.14                                                                      | Do you have any plans to shift somewhere else Next year?                                                                                                                                                                                                                                                                              |                   | 1.Yes                        | 2.No                        | 3.Don't know |                     |     |
| 3.15                                                                      | Profession of House Hold Head                                                                                                                                                                                                                                                                                                         |                   |                              |                             |              | Use codes Of Q # 16 |     |
| Q # 3.16: Profession of the most supportive person in household expenses. |                                                                                                                                                                                                                                                                                                                                       |                   |                              |                             |              |                     |     |
| 3.16                                                                      | 1)Professional 2)Office worker 3)Business man 4)Soldier/working wearing uniform<br>5) Unskilled working with hands 6) Skilled working with hands 7) Vegetable seller 8) Vendo<br>9) Farmer 10) Cook 11) Driver 12) Student 13) Unemployed 14) Retired 15) Housewife<br>16) Janitor 17) Laboratory worker 18) Any Other Explain: _____ |                   |                              |                             |              |                     |     |

#### Section 4: Information Awareness

| Question # | Questions                                          | Answers                 | Skips |
|------------|----------------------------------------------------|-------------------------|-------|
| 4.1        | Do you usually boil water before drinking?         | 1.Yes 2.No 3.Don't know |       |
| 4.2        | Do you wash your hands before eating?              | 1.Yes 2.No 3.Don't know |       |
| 4.3        | Do you wash your hands after toilet?               | 1.Yes 2.No 3.Don't know |       |
| 4.4        | Observe whether soap is available at washing Area? | 1.Yes 2.No 3.Don't know |       |

|      |                                                                                                       |                                                                                                  |                                  |
|------|-------------------------------------------------------------------------------------------------------|--------------------------------------------------------------------------------------------------|----------------------------------|
| 4.5  | Observe where is the dustbin placed?                                                                  | 1. In the house 2. Outside home 3.No dustbin<br>4. Any other explain: _____<br>98. Don't know    |                                  |
| 4.6  | What technique do you use to stop the breeding of flies and mosquitos?                                | 1. Spray 2. Mat 3. Mosquito net 4. Globe<br>5. Smoke Or frankincense 6. Any other explain: _____ | Multiple responses               |
| 4.7  | Where and to whom do you and your family member go for medical check up?                              | 1. Govt. Health care facility<br>2. Private health care facility<br>3. Any other explain: _____  |                                  |
| 4.8  | How much time does it take to reach any govt Or private health care facility near your house by walk? | 1.Time ( in minutes): _____                                                                      |                                  |
| 4.9  | Write down the name and address of the private or government health care facility?                    | Name: _____<br>Address: _____                                                                    |                                  |
| 4.10 | Where do you take your children for Immunization?                                                     | 1. Govt. Health care facility<br>2. Private health care facility<br>3. MCCP Health Camp          |                                  |
| 4.11 | Write down the name and address of the private or government health care facility?                    | Name: _____<br>Address: _____                                                                    |                                  |
| 4.12 | Have you ever refused to immunize your Children with polio drops?                                     | 1.Yes 2.No 3.Don't know                                                                          | If the Answer Is 1 skip Q # 4.13 |
| 4.13 | If yes, Please tell us the reason.                                                                    | Reason: _____                                                                                    |                                  |

| Responsible person (S) | Name of person (S) (code) | Signature | Date (dd/mm/yyyy) |
|------------------------|---------------------------|-----------|-------------------|
| Data Collector         |                           |           |                   |
| Team Leader            |                           |           |                   |
| Monitoring Supervisor  |                           |           |                   |
| First Data Entry       |                           |           |                   |
| Second Data Entry      |                           |           |                   |

|  |  |  |  |  |  |
|--|--|--|--|--|--|
|  |  |  |  |  |  |
|--|--|--|--|--|--|

**MCCP End-line Questionnaire**

**Instructions:** Introduce yourself and explain the reason of your arrival.

Before starting the interview take verbal consent, did you get permission? YES  NO

If permission not granted, stop interviewing and proceed to the next household.

| <b>Section 1: Identification Information</b> |                                                                                                                                                                    |                                                                                  |
|----------------------------------------------|--------------------------------------------------------------------------------------------------------------------------------------------------------------------|----------------------------------------------------------------------------------|
| 1.1                                          | Name of City:                                                                                                                                                      | 1)Karachi (3) Bajaur (4) Kashmore                                                |
| 1.2                                          | Union Council / Tehsil (Code) :                                                                                                                                    | <input type="checkbox"/> <input type="checkbox"/> _____                          |
| 1.3                                          | Block, Street, Colony, Village code/ Name:                                                                                                                         | <input type="checkbox"/> <input type="checkbox"/> <input type="checkbox"/> _____ |
| 1.4                                          | Cluster Number:                                                                                                                                                    | <input type="checkbox"/> <input type="checkbox"/> <input type="checkbox"/>       |
| 1.5                                          | House Hold number:                                                                                                                                                 | <input type="checkbox"/> <input type="checkbox"/> <input type="checkbox"/>       |
| 1.6                                          | Complete Address including landmark:                                                                                                                               | _____<br>_____                                                                   |
| 1.7                                          | Name/Code of Interviewer:                                                                                                                                          | <input type="checkbox"/> <input type="checkbox"/> _____                          |
| 1.8                                          | For how long you live in this house                                                                                                                                | YY _____ MM _____ DD _____                                                       |
| 1.9                                          | Name of Respondent :                                                                                                                                               |                                                                                  |
|                                              | Age of Respondent (In Years) :                                                                                                                                     |                                                                                  |
| 1.10                                         | Gender of Respondent:                                                                                                                                              | 2. Male: <input type="checkbox"/> 2. Female <input type="checkbox"/>             |
| 1.11                                         | Qualification of Respondent: (Mention complete Years of education, mention code 55 for uneducated, 17 for Professional and 22 for religious studies, Respectively. |                                                                                  |
| 1.12                                         | Profession of Respondent: (Use Codes from given below)                                                                                                             |                                                                                  |
| 1.13                                         | Interview Date/Time HH _____ MM _____                                                                                                                              | YY _____ MM _____ DD _____                                                       |
| 1.14                                         | Result Of Interview:                                                                                                                                               | (2) Complete (2) Incomplete                                                      |
| 1.15                                         | If the interview is Incomplete, Mention the Reason.                                                                                                                | Reason: _____<br>_____                                                           |

|                            |                                                                                                                                                                                                                                                                                                           |
|----------------------------|-----------------------------------------------------------------------------------------------------------------------------------------------------------------------------------------------------------------------------------------------------------------------------------------------------------|
| Codes<br>For<br>Profession | 1)Professional 2)Office worker 3)Business man 4)Soldier/working wearing uniform<br>5) Unskilled working with hands 6) Skilled working with hands 7) Vegetable seller 8) Vendor<br>9) Farmer 10) Cook 11) Driver 12) Student 13) Unemployed 14) Retired 15) Housewife<br>16) Janitor 17) Laboratory worker |
|----------------------------|-----------------------------------------------------------------------------------------------------------------------------------------------------------------------------------------------------------------------------------------------------------------------------------------------------------|

**Section 2:**

|     |                                             |                                                      |                                                          |                                   |        |         |
|-----|---------------------------------------------|------------------------------------------------------|----------------------------------------------------------|-----------------------------------|--------|---------|
| 2.1 | (a) Total family members including Children | (b) Male Members including male children of all ages | (c) Female Members including female children of all ages | (d) Number of under-five children |        | Remarks |
|     |                                             |                                                      |                                                          | Male                              | Female |         |
|     |                                             |                                                      |                                                          |                                   |        |         |

| 2.2 | (c) Name of Child | (b) Father's Name | (c) (Gender) |              | (d) Age |        |      | (e) Vitamin A drops given in last 6 months?<br>Yes ---1 No ----2 | (f) OPV given in last campaign?<br>Yes ----1 No ----2 | (g) During polio campaign how many times polio drops are given?-' | Vaccination Card available<br>Yes ---1<br>No ---2 | Immunization Status (To be filled for every under 5- Child present in Household) |                       |                       |                       |                       |                       |
|-----|-------------------|-------------------|--------------|--------------|---------|--------|------|------------------------------------------------------------------|-------------------------------------------------------|-------------------------------------------------------------------|---------------------------------------------------|----------------------------------------------------------------------------------|-----------------------|-----------------------|-----------------------|-----------------------|-----------------------|
|     |                   |                   | Male -----1  | Female-----2 | Years   | Months | Days |                                                                  |                                                       |                                                                   |                                                   | At Birth                                                                         | At 6 Weeks            | At 10 Weeks           | At 14 Weeks           | At 9 months           | At 15 months          |
|     |                   |                   |              |              |         |        |      |                                                                  |                                                       |                                                                   |                                                   | Yes ---1<br>No -----2                                                            | Yes ---1<br>No -----2 | Yes ---1<br>No -----2 | Yes ---1<br>No -----2 | Yes ---1<br>No -----2 | Yes ---1<br>No -----2 |
| 1   |                   |                   |              |              |         |        |      |                                                                  |                                                       |                                                                   | BCG                                               | Penta 1                                                                          | Penta 2               | Penta 3               | Measles1              | Measles 2             |                       |
|     |                   |                   |              |              |         |        |      |                                                                  |                                                       |                                                                   | Source                                            | Source                                                                           | Source                | Source                | Source                | Source                |                       |
|     |                   |                   |              |              |         |        |      |                                                                  |                                                       |                                                                   | Scar                                              | PCV 1                                                                            | PCV 2                 | PCV 3                 |                       |                       |                       |
|     |                   |                   |              |              |         |        |      |                                                                  |                                                       |                                                                   | OPV 0                                             | Source                                                                           | Source                | Source                |                       |                       |                       |
|     |                   |                   |              |              |         |        |      |                                                                  |                                                       |                                                                   | Source                                            | OPV 1                                                                            | OPV 2                 | OPV 3                 |                       |                       |                       |
|     |                   |                   |              |              |         |        |      |                                                                  |                                                       |                                                                   |                                                   | Source                                                                           | Source                | Source                |                       |                       |                       |
| 2   |                   |                   |              |              |         |        |      |                                                                  |                                                       |                                                                   | BCG                                               | Penta 1                                                                          | Penta 2               | Penta 3               | Measles1              | Measles 2             |                       |
|     |                   |                   |              |              |         |        |      |                                                                  |                                                       |                                                                   | Source                                            | Source                                                                           | Source                | Source                | Source                | Source                |                       |
|     |                   |                   |              |              |         |        |      |                                                                  |                                                       |                                                                   | Scar                                              | PCV 1                                                                            | PCV 2                 | PCV 3                 |                       |                       |                       |
|     |                   |                   |              |              |         |        |      |                                                                  |                                                       |                                                                   | OPV 0                                             | Source                                                                           | Source                | Source                |                       |                       |                       |
|     |                   |                   |              |              |         |        |      |                                                                  |                                                       |                                                                   | Source                                            | OPV 1                                                                            | OPV 2                 | OPV 3                 |                       |                       |                       |
|     |                   |                   |              |              |         |        |      |                                                                  |                                                       |                                                                   |                                                   | Source                                                                           | Source                | Source                |                       |                       |                       |

**Codes:** Source= [1] Card [2] Reported by mother/care taker Scar Yes [1] No [2] Child not available [3]



List the under five children & answer the questions. If there are more than 7 children, please write on extra sheet.

| 2.2 | (d) Name of Child | (b) Father's Name | (c) (Gender)                |       | (d) Age |      |                                                               | (e)                                              | (f)                                                           | (g)                   | Vaccination Card available | Immunization Status (To be filled for every under 5- Child present in Household) |                       |                       |                       |                       |  |
|-----|-------------------|-------------------|-----------------------------|-------|---------|------|---------------------------------------------------------------|--------------------------------------------------|---------------------------------------------------------------|-----------------------|----------------------------|----------------------------------------------------------------------------------|-----------------------|-----------------------|-----------------------|-----------------------|--|
|     |                   |                   | Male -----1<br>Female-----2 | Years | Months  | Days | Vitamin A drops given in last 6 months?<br>Yes ---1 No -----2 | OPV given in last campaign?<br>Yes ---1 No ----2 | During polio campaign how many times polio drops are given?-- | At Birth              |                            | At 6 Weeks                                                                       | At 10 Weeks           | At 14 Weeks           | At 9 months           | At 15 months          |  |
|     |                   |                   |                             |       |         |      |                                                               |                                                  |                                                               | Yes ---1<br>No -----2 |                            | Yes ---1<br>No -----2                                                            | Yes ---1<br>No -----2 | Yes ---1<br>No -----2 | Yes ---1<br>No -----2 | Yes ---1<br>No -----2 |  |
| 3   |                   |                   |                             |       |         |      |                                                               |                                                  |                                                               |                       | BCG                        | Penta 1                                                                          | Penta 2               | Penta 3               | Measles1              | Measles 2             |  |
|     |                   |                   |                             |       |         |      |                                                               |                                                  |                                                               |                       | Source                     | Source                                                                           | Source                | Source                | Source                | Source                |  |
|     |                   |                   |                             |       |         |      |                                                               |                                                  |                                                               |                       | Scar                       | PCV 1                                                                            | PCV 2                 | PCV 3                 |                       |                       |  |
|     |                   |                   |                             |       |         |      |                                                               |                                                  |                                                               |                       | OPV 0                      | Source                                                                           | Source                | Source                |                       |                       |  |
|     |                   |                   |                             |       |         |      |                                                               |                                                  |                                                               |                       | Source                     | OPV 1                                                                            | OPV 2                 | OPV 3                 |                       |                       |  |
|     |                   |                   |                             |       |         |      |                                                               |                                                  |                                                               |                       |                            | Source                                                                           | Source                | Source                |                       |                       |  |
| 4   |                   |                   |                             |       |         |      |                                                               |                                                  |                                                               |                       | BCG                        | Penta 1                                                                          | Penta 2               | Penta 3               | Measles1              | Measles 2             |  |
|     |                   |                   |                             |       |         |      |                                                               |                                                  |                                                               |                       | Source                     | Source                                                                           | Source                | Source                | Source                | Source                |  |
|     |                   |                   |                             |       |         |      |                                                               |                                                  |                                                               |                       | Scar                       | PCV 1                                                                            | PCV 2                 | PCV 3                 |                       |                       |  |
|     |                   |                   |                             |       |         |      |                                                               |                                                  |                                                               |                       | OPV 0                      | Source                                                                           | Source                | Source                |                       |                       |  |
|     |                   |                   |                             |       |         |      |                                                               |                                                  |                                                               |                       | Source                     | OPV 1                                                                            | OPV 2                 | OPV 3                 |                       |                       |  |
|     |                   |                   |                             |       |         |      |                                                               |                                                  |                                                               |                       |                            | Source                                                                           | Source                | Source                |                       |                       |  |
| 5   |                   |                   |                             |       |         |      |                                                               |                                                  |                                                               |                       | BCG                        | Penta 1                                                                          | Penta 2               | Penta 3               | Measles1              | Measles 2             |  |
|     |                   |                   |                             |       |         |      |                                                               |                                                  |                                                               |                       | Source                     | Source                                                                           | Source                | Source                | Source                | Source                |  |
|     |                   |                   |                             |       |         |      |                                                               |                                                  |                                                               |                       | Scar                       | PCV 1                                                                            | PCV 2                 | PCV 3                 |                       |                       |  |
|     |                   |                   |                             |       |         |      |                                                               |                                                  |                                                               |                       | OPV 0                      | Source                                                                           | Source                | Source                |                       |                       |  |
|     |                   |                   |                             |       |         |      |                                                               |                                                  |                                                               |                       | Source                     | OPV 1                                                                            | OPV 2                 | OPV 3                 |                       |                       |  |
|     |                   |                   |                             |       |         |      |                                                               |                                                  |                                                               |                       |                            | Source                                                                           | Source                | Source                |                       |                       |  |

**Codes:** Source= [1] Card [2] Reported by mother/care taker Scar Yes [1] No [2] Child not available [3]



| <b>Section 3: Health Seeking Behavior</b> |                                                                                                       |                                                                                                      |             |              |                                       |
|-------------------------------------------|-------------------------------------------------------------------------------------------------------|------------------------------------------------------------------------------------------------------|-------------|--------------|---------------------------------------|
| <b>Question #</b>                         | <b>Questions</b>                                                                                      | <b>Answers</b>                                                                                       |             |              | <b>Skips</b>                          |
| 3.1                                       | Do you usually boil water before drinking?                                                            | 1. Always                                                                                            | 2. Sometime | 3. Never     |                                       |
| 3.2                                       | Do you wash your hands before eating?                                                                 | 1. Always                                                                                            | 2. Sometime | 3. Never     |                                       |
| 3.3                                       | Do you wash your hands after toilet?                                                                  | 1. Always                                                                                            | 2. Sometime | 3. Never     |                                       |
| 3.4                                       | What method(s) do you use to stop the breeding of flies and mosquitos?                                | 1. Spray 2. Mat 3. Mosquito net 4. Globe<br>5. Smoke Or frankincense 6. Any other<br>Explains: _____ |             |              | Multiple responses                    |
| 3.5                                       | Where and to whom do you and yours family members go for medical check up?                            | 1. Govt. Health care facility<br>2. Private health care facility<br>3. Any other explain:<br>_____   |             |              |                                       |
| 3.6                                       | How much time does it take to reach any Govt Or Private health care facility near your house by walk? | 1.Time ( in minutes):_____                                                                           |             |              |                                       |
| 3.7                                       | Do you vaccinate your children?                                                                       | 1.Yes                                                                                                | 2.No        | 3.Don't know |                                       |
| 3.8                                       | If No, please give reason?                                                                            |                                                                                                      |             |              |                                       |
| 3.9                                       | Where do you take your children for Immunization?                                                     | 1. Govt. Health care facility<br>2. Private health care facility<br>3. MCCP Health Camp              |             |              |                                       |
| 3.10                                      | Did your children receive polio drops during last national polio campaign?                            | 1.Yes                                                                                                | 2.No        | 3.Don't know |                                       |
| 3.11                                      | Have you ever refused to immunize your Children with polio drops?                                     | 1.Yes 2.No 3.Don't know<br>4.Sometimes                                                               |             |              | If the Answer Is 2 OR 3 skip Q # 3.12 |
| 3.12                                      | If Yes, Please tell us the reason?                                                                    | Reason: _____                                                                                        |             |              |                                       |

| <b>Section 4: Information Awareness</b> |                                                                                |                         |              |
|-----------------------------------------|--------------------------------------------------------------------------------|-------------------------|--------------|
| <b>Question #</b>                       | <b>Questions</b>                                                               | <b>Answers</b>          | <b>Skips</b> |
| 4.1                                     | Is it necessary to seek care at least 4 times during pregnancy?                | 1.Yes 2.No 3.Don't know |              |
| 4.2                                     | Is it necessary to use folic acid during pregnancy?                            | 1.Yes 2.No 3.Don't know |              |
| 4.3                                     | For a safe delivery following measures are Important.                          |                         |              |
| 4.3.1                                   | Trained health care facilitator                                                | 1.Yes 2.No 3.Don't know |              |
| 4.3.2                                   | Identification of proper health facility or hospital                           | 1.Yes 2.No 3.Don't know |              |
| 4.3.3                                   | Arrangement of money                                                           | 1.Yes 2.No 3.Don't know |              |
| 4.3.4                                   | Arrangement of vehicle                                                         | 1.Yes 2.No 3.Don't know |              |
| 4.3.5                                   | Tetanus vaccination                                                            | 1.Yes 2.No 3.Don't know |              |
| 4.4                                     | Should mother first milk (colostrum) be Discarded after birth?                 | 1.Yes 2.No 3.Don't know |              |
| 4.5                                     | Should children be feed only mother's milk for 6 Months? Even no water given?  | 1.Yes 2.No 3.Don't know |              |
| 4.6                                     | Do you think vitamin A drops are increases the strength immunity of children?  | 1.Yes 2.No 3.Don't know |              |
| 4.7                                     | Do you think vitamin A drops decrease the complication of measles in children? | 1.Yes 2.No 3.Don't know |              |
| 4.8                                     | Following are the measures for hygiene:                                        |                         |              |
| 4.8.1                                   | Washing hands before cooking and eating Food.                                  | 1.Yes 2.No 3.Don't know |              |
| 4.8.2                                   | Washing face with soap after toilet                                            | 1.Yes 2.No 3.Don't know |              |
| 4.8.3                                   | Use Boil water for drinking                                                    | 1.Yes 2.No 3.Don't know |              |
| 4.8.4                                   | Throw the HH garbage/ litter outside home on the street                        | 1.Yes 2.No 3.Don't know |              |

|       |                                                                                       |       |      |              |  |
|-------|---------------------------------------------------------------------------------------|-------|------|--------------|--|
| 4.8.5 | Breeding flies and mosquitos                                                          | 1.Yes | 2.No | 3.Don't know |  |
| 4.9   | Is the Objective of MCCP to give awareness about Mother & child health & vaccination? | 1.Yes | 2.No | 3.Don't know |  |

| <b>Section 5: Polio / IPV KAP Information and Awareness</b> |                                                                                                                                                |                                                                                                                                      |      |                        |                                                |
|-------------------------------------------------------------|------------------------------------------------------------------------------------------------------------------------------------------------|--------------------------------------------------------------------------------------------------------------------------------------|------|------------------------|------------------------------------------------|
| <b>Question #</b>                                           | <b>Questions</b>                                                                                                                               | <b>Answers</b>                                                                                                                       |      |                        | <b>Skips</b>                                   |
| 5.1                                                         | Is the polio disease curable?                                                                                                                  | 1.Yes                                                                                                                                | 2.No | 3.Don't know           |                                                |
| 5.2                                                         | Do you think polio is a major health problem?                                                                                                  | 1.Yes                                                                                                                                | 2.No | 3.Don't know           |                                                |
| 5.3                                                         | Even if the child has received all Routine vaccines, is it still important to give polio drops to all under 5 children in each Polio campaign? | 1.Yes                                                                                                                                | 2.No | 3.Don't know           |                                                |
| 5.4                                                         | Should polio drops be given to sick children during Polio campaigns?                                                                           | 1.Yes                                                                                                                                | 2.No | 3.Don't know           |                                                |
| 5.4A                                                        | How do you prevent your child from polio?                                                                                                      | 1. Appropriate procedure to bin garbage<br>2. Polio Vaccine<br>3. Away from polio effected child<br>4. Don't know<br>5. Other: _____ |      |                        | Multiple responses                             |
| 5.5                                                         | Do you think polio drops prevent your children Form this disease?                                                                              | 1.Yes                                                                                                                                | 2.No | 3.Don't know           |                                                |
| 5.6                                                         | In your opinion how beneficial is polio drops are?                                                                                             | 1. Completely safe                                                                                                                   |      | 2. Safe to some extent |                                                |
|                                                             |                                                                                                                                                | 3. Not safe                                                                                                                          |      | 4. Don't Know          |                                                |
| 5.7                                                         | Do you know that apart from polio drops, polio Injections are also available?                                                                  | 1.Yes                                                                                                                                | 2.No | 3.Don't know           |                                                |
| 5.8                                                         | Do you think polio injection should be Introduced?                                                                                             | 1.Yes                                                                                                                                | 2.No | 3.Don't know           |                                                |
| 5.9                                                         | How safe are the polio injections in your Opinion?                                                                                             | 1. Completely safe                                                                                                                   |      | 2. Safe to some extent |                                                |
|                                                             |                                                                                                                                                | 3. Not safe                                                                                                                          |      | 4. Don't Know          |                                                |
| 5.10                                                        | Will you get your children vaccinated with polio Injection?                                                                                    | 1.Yes                                                                                                                                | 2.No | 3.Don't know           | If the answer of is 1 ask 5.12 if 2 Ask 5.11 & |

|      |                                                                           |                                                                                                    |                          |
|------|---------------------------------------------------------------------------|----------------------------------------------------------------------------------------------------|--------------------------|
|      |                                                                           |                                                                                                    | If 3 skip 5.11 and 5.12. |
| 5.11 | If No, then why not?                                                      | Reason: _____                                                                                      |                          |
| 5.12 | Which place would you prefer for polio vaccine?                           | 1. Govt. Health care facility<br>2. Private health care facility<br>3. Any other explain:<br>_____ |                          |
| 5.13 | Do you recommend your child to give polio vaccine along with polio drops? | 1.Yes    2.No    3.Don't know                                                                      |                          |
| 5.14 | If No, please specify the reason?                                         | Reason: _____                                                                                      |                          |

**Section 6: Health Camp related Information (Do not ask from Group A)**

| Question # | Questions                                                            | Answers                                                                                                                                                                                                                                     | Skips                                                               |
|------------|----------------------------------------------------------------------|---------------------------------------------------------------------------------------------------------------------------------------------------------------------------------------------------------------------------------------------|---------------------------------------------------------------------|
| 6.1        | Did you visit MCCP health camp in last 6 months?                     | 1.Yes    2.No    3.Don't know                                                                                                                                                                                                               | If the answer of is 1 ask 6.2 if 2 Ask 6.3 & If 3 skip 6.2 and 6.3. |
| 6.2        | If Yes, what health facility did you receive?                        | 1. Mother health examination<br>2. Mother H.B<br>3. Medicines for mothers<br>4. Child health examination<br>5. Child H.B<br>6. Medicines for children<br>7. EPI vaccines for children<br>8. Polio drops for children<br>9. Any other: _____ | Multiple responses                                                  |
| 6.3        | If No, please specify the reason.                                    | Reason: _____                                                                                                                                                                                                                               |                                                                     |
| 6.4        | Do you think these types of camps should be Conducted in the future? | 1.Yes    2.No    3.Don't know                                                                                                                                                                                                               |                                                                     |
| 6.5        | If Yes, what would you suggest to make it more beneficial?           | Suggestions:                                                                                                                                                                                                                                |                                                                     |
| 6.6        | If No, please specify the reason.                                    | Reason: _____                                                                                                                                                                                                                               |                                                                     |
| 6.7        | Did you vaccinate your child with polio vaccine during these camps?  | 1.Yes    2.No    3.Don't know                                                                                                                                                                                                               | Ask this question                                                   |

|      |                                                                        |                                                           |                                |
|------|------------------------------------------------------------------------|-----------------------------------------------------------|--------------------------------|
|      |                                                                        |                                                           | in group C only                |
| 6.8  | If No, please specify the reason.                                      | Reason: _____                                             |                                |
| 6.9  | After receiving these vaccines did your child suffer with any illness? | 1.Yes    2.No    3.Don't know                             | If the answer of is 1 ask 6.10 |
| 6.10 | If yes, how does he suffer?                                            | 1. Diarrhea<br>2. Fever<br>3. Pain<br>4. Any other: _____ |                                |

| Responsible person (S) | Name of person (S) (code) | Signature | Date (dd/mm/yyyy) |
|------------------------|---------------------------|-----------|-------------------|
| Data Collector         |                           |           |                   |
| Team Leader            |                           |           |                   |
| Monitoring Supervisor  |                           |           |                   |
| First Data Entry       |                           |           |                   |
| Second Data Entry      |                           |           |                   |
